# Supplementary material
Source: PubMed Central journal article supplement (PMC3694776)
Supplement: NIHMS477764-supplement-Supplement.pdf [file NIHMS477764-supplement-Supplement.pdf]

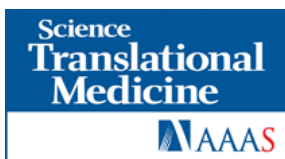

## Supplementary Materials for

### **Treatment and Prevention of Urinary Tract Infection with Orally Active FimH Inhibitors**

Corinne K. Cusumano, Jerome S. Pinkner, Zhenfu Han, Sarah E. Greene, Bradley A. Ford, Jan R. Crowley, Jeffrey P. Henderson, James W. Janetka,\* Scott J. Hultgren\*

\*To whom correspondence should be addressed. E-mail: hultgren@borcim.wustl.edu (S.J.H.); janetkaj@biochem.wustl.edu (J.W.J.)

Published 16 November 2011, *Sci. Transl. Med.* **3**, 109ra115 (2011)  
DOI: 10.1126/scitranslmed.3003021

#### **The PDF file includes:**

Fig. S1. Minimal degradation of compound **6** occurs after oral gavage.

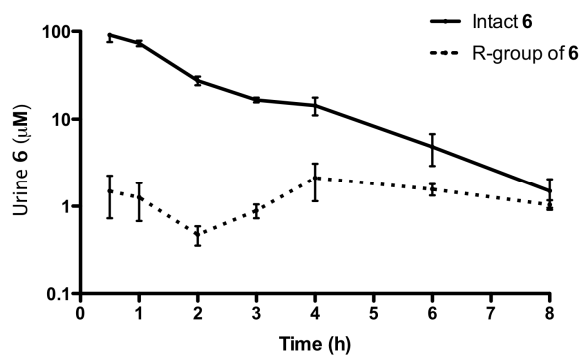

**Figure S1: Minimal degradation of compound 6 occurs after oral gavage.** Pharmacokinetic analysis of **6** ( $n \geq 3$  mice) showing concentration of intact compound **6** and its R-group degradation product in urine over time after a 100 mg/kg dose. The only detectable metabolism of the mannoside was hydrolysis of the glycosidic bond (yielding D-mannose and the phenol) but >95% of drug was excreted in the urine unchanged.
